# Supplementary material for: Two new four-connected zeolite-like magnesium aluminophosphates with intersecting 8-ring channels
Source: Royal Society of Chemistry journal article supplement (doi:10.1039/c4ra10950c), 2014-01-01
Supplement: c4ra10950c1.pdf [file c4ra10950c1.pdf]

Supporting Information

# **Two New Four-Connected Zeolite-like Magnesium Aluminophosphates with Intersecting 8-Ring Channels**

*Yanyan Wang, Ying Mu, Yanjun Sun and Jiyang Li\**

**State Key Laboratory of Inorganic Synthesis and Preparative Chemistry,**

**College of Chemistry, Jilin University, Changchun 130012, P. R. China**

**Table S1.** Crystal data and structure refinement for JU94 and JU95<sup>a</sup>.

| compounds                                            | JU94                                                                              | JU95                                                                              |
|------------------------------------------------------|-----------------------------------------------------------------------------------|-----------------------------------------------------------------------------------|
| empirical formula                                    | MgAl <sub>3</sub> P <sub>4</sub> O <sub>18</sub> C <sub>2</sub> H <sub>10</sub> N | MgAl <sub>3</sub> P <sub>4</sub> O <sub>18</sub> C <sub>2</sub> H <sub>10</sub> N |
| formula weight                                       | 565.24                                                                            | 565.24                                                                            |
| temperature                                          | 296(2) K                                                                          | 293(2) K                                                                          |
| wavelength(Å)                                        | 0.71073                                                                           | 0.71073                                                                           |
| crystal system, space group                          | Monoclinic, <i>P</i> 2 <sub>1</sub> / <i>c</i>                                    | Monoclinic, <i>P</i> 2 <sub>1</sub> / <i>n</i>                                    |
| unit cell dimensions                                 |                                                                                   |                                                                                   |
| <i>a</i> (Å)                                         | 12.3675(4)                                                                        | 8.1871(16)                                                                        |
| <i>b</i> (Å)                                         | 14.9405(5)                                                                        | 14.690(3)                                                                         |
| <i>c</i> (Å)                                         | 9.1706(3)                                                                         | 14.096(3)                                                                         |
| α (deg)                                              | 90                                                                                | 90                                                                                |
| β (deg)                                              | 98.4930(10)                                                                       | 92.24(3)                                                                          |
| γ (deg)                                              | 90                                                                                | 90                                                                                |
| volume(Å <sup>3</sup> )                              | 1675.93(10)                                                                       | 1694.0(6)                                                                         |
| Z, calculated density(mg/m <sup>3</sup> )            | 4, 2.240                                                                          | 4, 2.216                                                                          |
| absorption coefficient(mm <sup>-1</sup> )            | 0.746                                                                             | 0.738                                                                             |
| <i>F</i> (000)                                       | 1136                                                                              | 1136                                                                              |
| crystal size(mm <sup>3</sup> )                       | 0.21 × 0.15 × 0.14                                                                | 0.10 × 0.10 × 0.10                                                                |
| θ range(°) for data collection                       | 1.66–28.37                                                                        | 3.13–27.47                                                                        |
| limiting indices                                     | -13 ≤ <i>h</i> ≤ 16, -18 ≤ <i>k</i> ≤ 19, -12 ≤ <i>l</i> ≤ 10                     | -10 ≤ <i>h</i> ≤ 10, -19 ≤ <i>k</i> ≤ 17, -18 ≤ <i>l</i> ≤ 18                     |
| reflections collected/unique                         | 12289/4187, [ <i>R</i> (int) = 0.0315]                                            | 15881/3818, [ <i>R</i> (int) = 0.0255]                                            |
| completeness to θ (%)                                | 28.37, 99.9                                                                       | 27.47, 98.2                                                                       |
| absorption correction                                | semi-empirical from equivalents                                                   | semi-empirical from equivalents                                                   |
| max and min transmission                             | 0.9027 and 0.8591                                                                 | 0.9298 and 0.9298                                                                 |
| refinement method                                    | full-matrix least-squares on <i>F</i> <sup>2</sup>                                | full-matrix least-squares on <i>F</i> <sup>2</sup>                                |
| data/restraints/parameters                           | 4187/0/271                                                                        | 3818/0/262                                                                        |
| goodness-of-fit on <i>F</i> <sup>2</sup>             | 1.069                                                                             | 1.080                                                                             |
| final <i>R</i> indices [ <i>I</i> > 2 σ( <i>I</i> )] | <i>R</i> <sub>1</sub> = 0.0364, <i>wR</i> <sub>2</sub> = 0.1024                   | <i>R</i> <sub>1</sub> = 0.0342, <i>wR</i> <sub>2</sub> = 0.0951                   |
| <i>R</i> indices (all data)                          | <i>R</i> <sub>1</sub> = 0.0461, <i>wR</i> <sub>2</sub> = 0.1093                   | <i>R</i> <sub>1</sub> = 0.0372, <i>wR</i> <sub>2</sub> = 0.0964                   |
| largest diff. peak and hole (eÅ <sup>-3</sup> )      | 0.880 and -0.483                                                                  | 0.639 and -0.573                                                                  |

<sup>a</sup>  $R_1 = \sum(\Delta F/\sum(F_o))$ ,  $wR_2 = (\sum[w(F_o^2 - F_c^2)])/\sum[w(F_o^2)^2]^{1/2}$  and  $w = 1/\sigma^2(F_o^2)$ .

**Table S2.** Crystal data and structure refinement for JU94-400 and JU95-300<sup>a</sup>.

| compounds                                            | JU94-400                                                                         | JU95-300                                                                         |
|------------------------------------------------------|----------------------------------------------------------------------------------|----------------------------------------------------------------------------------|
| empirical formula                                    | MgAl <sub>3</sub> P <sub>4</sub> O <sub>17</sub> C <sub>2</sub> H <sub>8</sub> N | MgAl <sub>3</sub> P <sub>4</sub> O <sub>16</sub> C <sub>2</sub> H <sub>6</sub> N |
| formula weight                                       | 547.22                                                                           | 529.21                                                                           |
| temperature                                          | 296(2) K                                                                         | 296(2) K                                                                         |
| wavelength(Å)                                        | 0.71073                                                                          | 0.71073                                                                          |
| crystal system, space group                          | Monoclinic, <i>P</i> 2 <sub>1</sub> / <i>c</i>                                   | Monoclinic, <i>P</i> 2 <sub>1</sub> / <i>n</i>                                   |
| unit cell dimensions                                 |                                                                                  |                                                                                  |
| <i>a</i> (Å)                                         | 12.389(5)                                                                        | 8.3877(14)                                                                       |
| <i>b</i> (Å)                                         | 14.923(6)                                                                        | 14.399(2)                                                                        |
| <i>c</i> (Å)                                         | 9.386(4)                                                                         | 14.017(2)                                                                        |
| α (deg)                                              | 90                                                                               | 90                                                                               |
| β (deg)                                              | 98.699(7)                                                                        | 91.552(3)                                                                        |
| γ (deg)                                              | 90                                                                               | 90                                                                               |
| volume(Å <sup>3</sup> )                              | 1715.2(12)                                                                       | 1692.4(5)                                                                        |
| <i>Z</i> , calculated density(mg/m <sup>3</sup> )    | 4, 2.119                                                                         | 4, 2.077                                                                         |
| absorption coefficient(mm <sup>-1</sup> )            | 0.721                                                                            | 0.723                                                                            |
| <i>F</i> (000)                                       | 1096                                                                             | 1056                                                                             |
| crystal size(mm <sup>3</sup> )                       | 0.20 × 0.12 × 0.10                                                               | 0.30 × 0.20 × 0.05                                                               |
| θ range(°) for data collection                       | 1.66–29.39                                                                       | 2.03–28.27                                                                       |
| limiting indices                                     | -8 ≤ <i>h</i> ≤ 17, -20 ≤ <i>k</i> ≤ 20, -12 ≤ <i>l</i> ≤ 12                     | -10 ≤ <i>h</i> ≤ 11, -16 ≤ <i>k</i> ≤ 19, -18 ≤ <i>l</i> ≤ 18                    |
| reflections collected/unique                         | 13511/4653, [ <i>R</i> (int) = 0.0681]                                           | 13543/4196, [ <i>R</i> (int) = 0.0391]                                           |
| completeness to θ (%)                                | 29.39, 98.5                                                                      | 28.27, 99.9                                                                      |
| absorption correction                                | semi-empirical from equivalents                                                  | semi-empirical from equivalents                                                  |
| max and min transmission                             | 0.9314 and 0.8692                                                                | 0.9648 and 0.8123                                                                |
| refinement method                                    | full-matrix least-squares on <i>F</i> <sup>2</sup>                               | full-matrix least-squares on <i>F</i> <sup>2</sup>                               |
| data/restraints/parameters                           | 4653/0/253                                                                       | 4196/0/244                                                                       |
| goodness-of-fit on <i>F</i> <sup>2</sup>             | 1.120                                                                            | 1.123                                                                            |
| final <i>R</i> indices [ <i>I</i> > 2 σ( <i>I</i> )] | <i>R</i> <sub>1</sub> = 0.0950, <i>wR</i> <sub>2</sub> = 0.2521                  | <i>R</i> <sub>1</sub> = 0.0497, <i>wR</i> <sub>2</sub> = 0.1248                  |
| <i>R</i> indices (all data)                          | <i>R</i> <sub>1</sub> = 0.1289, <i>wR</i> <sub>2</sub> = 0.2681                  | <i>R</i> <sub>1</sub> = 0.0629, <i>wR</i> <sub>2</sub> = 0.1310                  |
| largest diff. peak and hole (eÅ <sup>-3</sup> )      | 1.804 and -0.809                                                                 | 1.335 and -0.506                                                                 |

<sup>a</sup>  $R_1 = \sum(\Delta F/\sum(F_o))$ ,  $wR_2 = (\sum[w(F_o^2 - F_c^2)])/\sum[w(F_o^2)^2]^{1/2}$  and  $w = 1/\sigma^2(F_o^2)$ .

**Table S3.** Selected bond lengths [ $\text{\AA}$ ] and angles [deg] for JU94 and JU94-400.

| JU94                  |           | JU94-400         |           |
|-----------------------|-----------|------------------|-----------|
| Mg(1)-O(10)#1         | 2.033(2)  | Mg(1)-O(16)#7    | 1.971(7)  |
| Mg(1)-O(12)#1         | 2.052(2)  | Mg(1)-O(14)      | 2.002(7)  |
| Mg(1)-O(9)#1          | 2.065(2)  | Mg(1)-O(5)       | 2.016(7)  |
| Mg(1)-O(4)            | 2.075(2)  | Mg(1)-O(6)       | 2.060(7)  |
| Mg(1)-O(18)           | 2.085(2)  | Mg(1)-O(17)      | 2.098(8)  |
| Mg(1)-O(17)           | 2.232(3)  | Al(1)-O(7)       | 1.738(6)  |
| Al(1)-O(14)#2         | 1.720(2)  | Al(1)-O(10)#1    | 1.740(6)  |
| Al(1)-O(5)#1          | 1.730(2)  | Al(1)-O(4)       | 1.747(6)  |
| Al(1)-O(2)#3          | 1.740(2)  | Al(1)-O(1)       | 1.750(6)  |
| Al(1)-O(6)            | 1.741(2)  | Al(2)-O(11)#2    | 1.721(6)  |
| Al(2)-O(16)           | 1.732(2)  | Al(2)-O(13)#3    | 1.737(6)  |
| Al(2)-O(3)            | 1.732(2)  | Al(2)-O(2)#3     | 1.742(6)  |
| Al(2)-O(15)#4         | 1.734(2)  | Al(2)-O(3)       | 1.746(6)  |
| Al(2)-O(13)           | 1.746(2)  | Al(3)-O(15)#4    | 1.716(7)  |
| Al(3)-O(1)#5          | 1.716(2)  | Al(3)-O(9)#5     | 1.743(7)  |
| Al(3)-O(11)           | 1.733(2)  | Al(3)-O(8)#6     | 1.753(7)  |
| Al(3)-O(8)#6          | 1.734(2)  | Al(3)-O(12)      | 1.758(6)  |
| Al(3)-O(7)            | 1.736(2)  | P(1)-O(14)       | 1.506(6)  |
| P(1)-O(4)             | 1.496(2)  | P(1)-O(4)        | 1.544(6)  |
| P(1)-O(16)            | 1.528(2)  | P(1)-O(11)       | 1.545(6)  |
| P(1)-O(14)            | 1.532(2)  | P(1)-O(10)       | 1.550(6)  |
| P(1)-O(6)             | 1.541(2)  | P(2)-O(6)        | 1.512(6)  |
| P(2)-O(12)            | 1.501(2)  | P(2)-O(8)        | 1.520(6)  |
| P(2)-O(5)             | 1.527(2)  | P(2)-O(3)        | 1.531(6)  |
| P(2)-O(8)             | 1.528(2)  | P(2)-O(2)        | 1.551(6)  |
| P(2)-O(11)            | 1.540(2)  | P(3)-O(16)       | 1.500(7)  |
| P(3)-O(10)            | 1.488(2)  | P(3)-O(7)        | 1.512(6)  |
| P(3)-O(3)             | 1.535(2)  | P(3)-O(15)       | 1.521(7)  |
| P(3)-O(1)             | 1.536(2)  | P(3)-O(9)        | 1.547(7)  |
| P(3)-O(15)            | 1.537(2)  | P(4)-O(5)        | 1.498(6)  |
| P(4)-O(9)             | 1.486(2)  | P(4)-O(12)       | 1.533(6)  |
| P(4)-O(2)             | 1.540(2)  | P(4)-O(1)        | 1.549(6)  |
| P(4)-O(13)            | 1.543(2)  | P(4)-O(13)       | 1.562(6)  |
| P(4)-O(7)             | 1.545(2)  | N(1)-C(1)        | 1.476(14) |
| N(1)-C(1)             | 1.408(5)  | N(1)-C(2)        | 1.491(16) |
| N(1)-C(2)             | 1.620(6)  | C(1)-C(2)#11     | 1.549(16) |
| C(1)-C(2)#9           | 1.506(6)  | C(2)-C(1)#11     | 1.549(16) |
| C(1)-N(2)             | 1.654(9)  |                  |           |
| C(2)-N(2)             | 1.446(9)  |                  |           |
| O(10)#1-Mg(1)-O(12)#1 | 90.51(9)  | O(14)-P(1)-O(4)  | 112.8(4)  |
| O(10)#1-Mg(1)-O(9)#1  | 95.02(10) | O(14)-P(1)-O(11) | 109.7(4)  |

---

|                      |            |                       |          |
|----------------------|------------|-----------------------|----------|
| O(12)#1-Mg(1)-O(9)#1 | 93.76(9)   | O(4)-P(1)-O(11)       | 108.6(4) |
| O(10)#1-Mg(1)-O(4)   | 167.94(10) | O(14)-P(1)-O(10)      | 110.9(4) |
| O(12)#1-Mg(1)-O(4)   | 92.12(9)   | O(4)-P(1)-O(10)       | 107.0(3) |
| O(9)#1-Mg(1)-O(4)    | 96.55(9)   | O(11)-P(1)-O(10)      | 107.6(4) |
| O(10)#1-Mg(1)-O(18)  | 89.95(10)  | O(6)-P(2)-O(8)        | 113.6(4) |
| O(12)#1-Mg(1)-O(18)  | 176.73(10) | O(6)-P(2)-O(3)        | 108.6(4) |
| O(9)#1-Mg(1)-O(18)   | 89.43(10)  | O(8)-P(2)-O(3)        | 110.9(4) |
| O(4)-Mg(1)-O(18)     | 86.78(9)   | O(6)-P(2)-O(2)        | 110.3(4) |
| O(10)#1-Mg(1)-O(17)  | 82.35(10)  | O(8)-P(2)-O(2)        | 106.0(4) |
| O(12)#1-Mg(1)-O(17)  | 89.29(10)  | O(3)-P(2)-O(2)        | 107.3(4) |
| O(9)#1-Mg(1)-O(17)   | 176.00(10) | O(16)-P(3)-O(7)       | 112.7(4) |
| O(4)-Mg(1)-O(17)     | 85.92(10)  | O(16)-P(3)-O(15)      | 111.6(4) |
| O(18)-Mg(1)-O(17)    | 87.57(10)  | O(7)-P(3)-O(15)       | 107.2(4) |
| O(14)#2-Al(1)-O(5)#1 | 111.40(12) | O(16)-P(3)-O(9)       | 111.5(4) |
| O(14)#2-Al(1)-O(2)#3 | 103.61(11) | O(7)-P(3)-O(9)        | 106.3(4) |
| O(5)#1-Al(1)-O(2)#3  | 110.29(11) | O(15)-P(3)-O(9)       | 107.2(4) |
| O(14)#2-Al(1)-O(6)   | 113.58(12) | O(5)-P(4)-O(12)       | 112.3(4) |
| O(5)#1-Al(1)-O(6)    | 108.88(11) | O(5)-P(4)-O(1)        | 113.5(3) |
| O(2)#3-Al(1)-O(6)    | 108.95(12) | O(12)-P(4)-O(1)       | 105.7(3) |
| O(16)-Al(2)-O(3)     | 111.50(11) | O(5)-P(4)-O(13)       | 113.7(4) |
| O(16)-Al(2)-O(15)#4  | 109.85(10) | O(12)-P(4)-O(13)      | 106.9(4) |
| O(3)-Al(2)-O(15)#4   | 110.65(11) | O(1)-P(4)-O(13)       | 103.9(3) |
| O(16)-Al(2)-O(13)    | 107.77(11) | O(7)-Al(1)-O(10)#1    | 109.9(3) |
| O(3)-Al(2)-O(13)     | 109.71(10) | O(7)-Al(1)-O(4)       | 110.3(3) |
| O(15)#4-Al(2)-O(13)  | 107.23(10) | O(10)#1-Al(1)-O(4)    | 111.4(3) |
| O(1)#5-Al(3)-O(11)   | 108.65(11) | O(7)-Al(1)-O(1)       | 109.5(3) |
| O(1)#5-Al(3)-O(8)#6  | 110.29(11) | O(10)#1-Al(1)-O(1)    | 106.0(3) |
| O(11)-Al(3)-O(8)#6   | 109.91(11) | O(4)-Al(1)-O(1)       | 109.5(3) |
| O(1)#5-Al(3)-O(7)    | 109.25(11) | O(11)#2-Al(2)-O(13)#3 | 107.2(3) |
| O(11)-Al(3)-O(7)     | 110.18(11) | O(11)#2-Al(2)-O(2)#3  | 110.2(3) |
| O(8)#6-Al(3)-O(7)    | 108.54(12) | O(13)#3-Al(2)-O(2)#3  | 110.8(3) |
| O(4)-P(1)-O(16)      | 112.43(12) | O(11)#2-Al(2)-O(3)    | 109.8(3) |
| O(4)-P(1)-O(14)      | 111.16(13) | O(13)#3-Al(2)-O(3)    | 109.0(3) |
| O(16)-P(1)-O(14)     | 106.16(13) | O(2)#3-Al(2)-O(3)     | 109.8(3) |
| O(4)-P(1)-O(6)       | 111.55(13) | O(15)#4-Al(3)-O(9)#5  | 114.7(4) |
| O(16)-P(1)-O(6)      | 106.71(12) | O(15)#4-Al(3)-O(8)#6  | 109.7(4) |
| O(14)-P(1)-O(6)      | 108.56(14) | O(9)#5-Al(3)-O(8)#6   | 109.6(3) |
| O(12)-P(2)-O(5)      | 113.25(12) | O(15)#4-Al(3)-O(12)   | 106.4(4) |
| O(12)-P(2)-O(8)      | 108.93(12) | O(9)#5-Al(3)-O(12)    | 108.1(4) |
| O(5)-P(2)-O(8)       | 110.14(13) | O(8)#6-Al(3)-O(12)    | 108.1(3) |
| O(12)-P(2)-O(11)     | 110.77(12) | O(16)#7-Mg(1)-O(14)   | 151.5(3) |
| O(5)-P(2)-O(11)      | 106.66(12) | O(16)#7-Mg(1)-O(5)    | 105.9(3) |
| O(8)-P(2)-O(11)      | 106.90(12) | O(14)-Mg(1)-O(5)      | 101.9(3) |
| O(10)-P(3)-O(3)      | 112.97(12) | O(16)#7-Mg(1)-O(6)    | 93.2(3)  |

---

|                  |            |                     |          |
|------------------|------------|---------------------|----------|
| O(10)-P(3)-O(1)  | 110.19(13) | O(14)-Mg(1)-O(6)    | 88.7(3)  |
| O(3)-P(3)-O(1)   | 108.04(12) | O(5)-Mg(1)-O(6)     | 98.6(3)  |
| O(10)-P(3)-O(15) | 111.86(13) | O(16)#7-Mg(1)-O(17) | 84.9(3)  |
| O(3)-P(3)-O(15)  | 106.79(12) | O(14)-Mg(1)-O(17)   | 85.8(3)  |
| O(1)-P(3)-O(15)  | 106.70(12) | O(5)-Mg(1)-O(17)    | 96.7(4)  |
| O(9)-P(4)-O(2)   | 112.01(13) | O(6)-Mg(1)-O(17)    | 164.6(4) |
| O(9)-P(4)-O(13)  | 114.15(12) |                     |          |
| O(2)-P(4)-O(13)  | 105.36(12) |                     |          |
| O(9)-P(4)-O(7)   | 113.75(13) |                     |          |
| O(2)-P(4)-O(7)   | 107.47(13) |                     |          |
| O(13)-P(4)-O(7)  | 103.32(12) |                     |          |

For JU94: Symmetry transformations used to generate equivalent atoms: #1  $-x,-y,-z+1$  #2  $x,-y+1/2,z-1/2$   
#3  $-x,y+1/2,-z+3/2$  #4  $x,-y+1/2,z+1/2$  #5  $-x-1,-y,-z+1$  #6  $x,-y-1/2,z+1/2$  #7  $-x,y-1/2,-z+3/2$   
#8  $x,-y-1/2,z-1/2$  #9  $-x-1,-y,-z$

For JU94-400: Symmetry transformations used to generate equivalent atoms: #1  $x,-y+1/2,z+1/2$  #2  $-x,y-1/2,-z-1/2$   
#3  $x,-y-1/2,z-1/2$  #4  $-x+1,-y,-z+1$  #5  $-x+1,y-1/2,-z+1/2$  #6  $x,-y-1/2,z+1/2$  #7  $-x+1,-y,-z$   
#8  $-x+1,y+1/2,-z+1/2$  #9  $x,-y+1/2,z-1/2$  #10  $-x,y+1/2,-z-1/2$  #11  $-x,-y+2,-z+1$

**Table S4.** Selected bond lengths [ $\text{\AA}$ ] and angles [deg] for JU95 and JU95-300.

| JU95           |            | JU95-300         |            |
|----------------|------------|------------------|------------|
| P(1)-O(2)      | 1.496(2)   | P(1)-O(13)       | 1.499(3)   |
| P(1)-O(3)      | 1.5287(19) | P(1)-O(2)        | 1.512(3)   |
| P(1)-O(1)      | 1.5383(18) | P(1)-O(12)       | 1.514(3)   |
| P(1)-O(4)      | 1.5382(19) | P(1)-O(1)        | 1.540(3)   |
| P(2)-O(6)      | 1.483(2)   | P(2)-O(7)        | 1.511(3)   |
| P(2)-O(7)      | 1.517(2)   | P(2)-O(16)       | 1.519(3)   |
| P(2)-O(8)      | 1.521(2)   | P(2)-O(5)        | 1.519(3)   |
| P(2)-O(5)      | 1.5380(18) | P(2)-O(3)        | 1.533(3)   |
| P(3)-O(11)     | 1.489(2)   | P(3)-O(15)       | 1.487(3)   |
| P(3)-O(12)     | 1.512(2)   | P(3)-O(9)        | 1.521(3)   |
| P(3)-O(10)     | 1.521(2)   | P(3)-O(14)       | 1.525(3)   |
| P(3)-O(9)      | 1.535(2)   | P(3)-O(6)        | 1.551(3)   |
| P(4)-O(16)     | 1.482(2)   | P(4)-O(4)        | 1.490(3)   |
| P(4)-O(13)     | 1.530(2)   | P(4)-O(11)       | 1.529(3)   |
| P(4)-O(14)     | 1.5328(18) | P(4)-O(8)        | 1.531(3)   |
| P(4)-O(15)     | 1.537(2)   | P(4)-O(10)#1     | 1.536(3)   |
| Al(1)-O(12)#1  | 1.703(2)   | P(4)-Mg(1)       | 3.1516(17) |
| Al(1)-O(13)    | 1.719(2)   | Al(2)-O(10)      | 1.707(3)   |
| Al(1)-O(7)#2   | 1.721(2)   | Al(2)-O(12)      | 1.711(3)   |
| Al(1)-O(3)     | 1.730(2)   | Al(2)-O(6)       | 1.749(3)   |
| Al(2)-O(5)     | 1.725(2)   | Al(2)-O(3)       | 1.758(3)   |
| Al(2)-O(10)#3  | 1.726(2)   | Al(3)-O(5)       | 1.715(3)   |
| Al(2)-O(15)#4  | 1.732(2)   | Al(3)-O(9)#2     | 1.725(3)   |
| Al(2)-O(1)     | 1.7448(19) | Al(3)-O(11)      | 1.725(3)   |
| Al(3)-O(8)#5   | 1.718(2)   | Al(3)-O(1)       | 1.746(3)   |
| Al(3)-O(14)    | 1.726(2)   | Al(1)-O(2)       | 1.711(3)   |
| Al(3)-O(4)#3   | 1.740(2)   | Al(1)-O(14)#4    | 1.723(3)   |
| Al(3)-O(9)     | 1.745(2)   | Al(1)-O(8)#4     | 1.734(3)   |
| Mg(8)-O(16)    | 1.992(2)   | Al(1)-O(16)#5    | 1.734(3)   |
| Mg(8)-O(11)#6  | 2.039(2)   | Mg(1)-O(15)#3    | 1.902(3)   |
| Mg(8)-O(6)#7   | 2.051(2)   | Mg(1)-O(4)       | 1.917(3)   |
| Mg(8)-O(2)     | 2.068(2)   | Mg(1)-O(13)#3    | 1.928(3)   |
| Mg(8)-O(17)    | 2.126(2)   | Mg(1)-O(7)       | 1.994(3)   |
| Mg(8)-O(18)    | 2.199(3)   | N(1)-C(1)        | 1.496(7)   |
| N(1)-C(2)      | 1.489(5)   | N(1)-C(2)        | 1.502(7)   |
| N(1)-C(1)      | 1.508(4)   | C(1)-C(2)#11     | 1.520(7)   |
| C(2)-C(1)#13   | 1.514(6)   | C(2)-C(1)#11     | 1.520(7)   |
| C(1)-C(2)#13   | 1.514(6)   |                  |            |
| O(2)-P(1)-O(3) | 111.51(12) | O(13)-P(1)-O(2)  | 111.67(19) |
| O(2)-P(1)-O(1) | 110.56(11) | O(13)-P(1)-O(12) | 111.33(18) |
| O(3)-P(1)-O(1) | 105.23(11) | O(2)-P(1)-O(12)  | 108.3(2)   |

---

|                       |            |                       |            |
|-----------------------|------------|-----------------------|------------|
| O(2)-P(1)-O(4)        | 113.28(12) | O(13)-P(1)-O(1)       | 110.61(19) |
| O(3)-P(1)-O(4)        | 108.19(12) | O(2)-P(1)-O(1)        | 105.71(18) |
| O(1)-P(1)-O(4)        | 107.67(11) | O(12)-P(1)-O(1)       | 109.01(18) |
| O(6)-P(2)-O(7)        | 112.06(16) | O(7)-P(2)-O(16)       | 111.37(19) |
| O(6)-P(2)-O(8)        | 110.66(16) | O(7)-P(2)-O(5)        | 111.25(18) |
| O(7)-P(2)-O(8)        | 108.17(18) | O(16)-P(2)-O(5)       | 108.68(19) |
| O(6)-P(2)-O(5)        | 112.59(12) | O(7)-P(2)-O(3)        | 109.42(17) |
| O(7)-P(2)-O(5)        | 107.04(12) | O(16)-P(2)-O(3)       | 106.46(16) |
| O(8)-P(2)-O(5)        | 106.01(13) | O(5)-P(2)-O(3)        | 109.53(16) |
| O(11)-P(3)-O(12)      | 110.51(17) | O(10)-Al(2)-O(12)     | 110.46(17) |
| O(11)-P(3)-O(10)      | 112.52(13) | O(10)-Al(2)-O(6)      | 110.53(16) |
| O(12)-P(3)-O(10)      | 108.78(14) | O(12)-Al(2)-O(6)      | 115.58(17) |
| O(11)-P(3)-O(9)       | 110.29(12) | O(10)-Al(2)-O(3)      | 108.24(15) |
| O(12)-P(3)-O(9)       | 106.11(15) | O(12)-Al(2)-O(3)      | 108.64(15) |
| O(10)-P(3)-O(9)       | 108.39(12) | O(6)-Al(2)-O(3)       | 102.90(15) |
| O(16)-P(4)-O(13)      | 112.93(13) | O(15)-P(3)-O(9)       | 111.81(18) |
| O(16)-P(4)-O(14)      | 109.87(12) | O(15)-P(3)-O(14)      | 112.2(2)   |
| O(13)-P(4)-O(14)      | 106.67(11) | O(9)-P(3)-O(14)       | 107.49(17) |
| O(16)-P(4)-O(15)      | 113.26(14) | O(15)-P(3)-O(6)       | 110.86(18) |
| O(13)-P(4)-O(15)      | 106.38(12) | O(9)-P(3)-O(6)        | 107.28(17) |
| O(14)-P(4)-O(15)      | 107.36(12) | O(14)-P(3)-O(6)       | 106.88(18) |
| O(12)#1-Al(1)-O(13)   | 108.47(12) | O(4)-P(4)-O(11)       | 111.74(19) |
| O(12)#1-Al(1)-O(7)#2  | 110.58(16) | O(4)-P(4)-O(8)        | 111.32(18) |
| O(13)-Al(1)-O(7)#2    | 108.58(11) | O(11)-P(4)-O(8)       | 107.40(16) |
| O(12)#1-Al(1)-O(3)    | 106.74(14) | O(4)-P(4)-O(10)#1     | 112.35(19) |
| O(13)-Al(1)-O(3)      | 112.04(10) | O(11)-P(4)-O(10)#1    | 107.28(18) |
| O(7)#2-Al(1)-O(3)     | 110.42(13) | O(8)-P(4)-O(10)#1     | 106.45(17) |
| O(5)-Al(2)-O(10)#3    | 108.69(11) | O(4)-P(4)-Mg(1)       | 25.45(13)  |
| O(5)-Al(2)-O(15)#4    | 111.46(11) | O(11)-P(4)-Mg(1)      | 92.35(13)  |
| O(10)#3-Al(2)-O(15)#4 | 115.66(12) | O(8)-P(4)-Mg(1)       | 103.96(12) |
| O(5)-Al(2)-O(1)       | 106.42(9)  | O(10)#1-P(4)-Mg(1)    | 136.38(13) |
| O(10)#3-Al(2)-O(1)    | 108.38(10) | O(5)-Al(3)-O(9)#2     | 107.47(16) |
| O(15)#4-Al(2)-O(1)    | 105.77(11) | O(5)-Al(3)-O(11)      | 111.99(17) |
| O(8)#5-Al(3)-O(14)    | 112.19(12) | O(9)#2-Al(3)-O(11)    | 110.18(14) |
| O(8)#5-Al(3)-O(4)#3   | 115.71(12) | O(5)-Al(3)-O(1)       | 110.48(15) |
| O(14)-Al(3)-O(4)#3    | 105.55(10) | O(9)#2-Al(3)-O(1)     | 110.69(16) |
| O(8)#5-Al(3)-O(9)     | 105.09(14) | O(11)-Al(3)-O(1)      | 106.07(16) |
| O(14)-Al(3)-O(9)      | 108.04(10) | O(15)#3-Mg(1)-O(4)    | 109.36(16) |
| O(4)#3-Al(3)-O(9)     | 110.10(10) | O(15)#3-Mg(1)-O(13)#3 | 110.47(15) |
| O(16)-Mg(8)-O(11)#6   | 96.00(11)  | O(4)-Mg(1)-O(13)#3    | 124.33(16) |
| O(16)-Mg(8)-O(6)#7    | 92.68(11)  | O(15)#3-Mg(1)-O(7)    | 108.03(16) |
| O(11)#6-Mg(8)-O(6)#7  | 170.00(11) | O(4)-Mg(1)-O(7)       | 105.19(15) |
| O(16)-Mg(8)-O(2)      | 96.59(10)  | O(13)#3-Mg(1)-O(7)    | 97.66(15)  |
| O(11)#6-Mg(8)-O(2)    | 89.04(9)   | O(15)#3-Mg(1)-P(4)    | 105.19(11) |

---



|                     |            |                       |            |
|---------------------|------------|-----------------------|------------|
| O(6)#7-Mg(8)-O(2)   | 94.91(9)   | O(4)-Mg(1)-P(4)       | 19.51(10)  |
| O(16)-Mg(8)-O(17)   | 90.08(10)  | O(13)#3-Mg(1)-P(4)    | 139.40(11) |
| O(11)#6-Mg(8)-O(17) | 90.01(9)   | O(7)-Mg(1)-P(4)       | 89.03(11)  |
| O(6)#7-Mg(8)-O(17)  | 85.01(9)   | O(2)-Al(1)-O(14)#4    | 109.22(17) |
| O(2)-Mg(8)-O(17)    | 173.32(10) | O(2)-Al(1)-O(8)#4     | 110.71(16) |
| O(16)-Mg(8)-O(18)   | 175.92(10) | O(14)#4-Al(1)-O(8)#4  | 106.78(15) |
| O(11)#6-Mg(8)-O(18) | 87.53(11)  | O(2)-Al(1)-O(16)#5    | 108.17(17) |
| O(6)#7-Mg(8)-O(18)  | 83.63(11)  | O(14)#4-Al(1)-O(16)#5 | 113.48(16) |
| O(2)-Mg(8)-O(18)    | 85.48(9)   | O(8)#4-Al(1)-O(16)#5  | 108.49(16) |
| O(17)-Mg(8)-O(18)   | 87.88(10)  |                       |            |

For JU95: Symmetry transformations used to generate equivalent atoms: #1  $x-1/2, -y+1/2, z+1/2$  #2  $-x, -y+1, -z+1$  #3  $-x, -y+1, -z$  #4  $-x+1/2, y+1/2, -z+1/2$  #5  $-x-1/2, y-1/2, -z+1/2$  #6  $x+1/2, -y+1/2, z+1/2$  #7  $x+1/2, -y+3/2, z-1/2$  #8  $x-1/2, -y+3/2, z+1/2$  #9  $-x+1/2, y-1/2, -z+1/2$  #10  $x-1/2, -y+1/2, z-1/2$  #11  $x+1/2, -y+1/2, z-1/2$  #12  $-x-1/2, y+1/2, -z+1/2$  #13  $-x, -y, -z$

For JU95-300: Symmetry transformations used to generate equivalent atoms: #1  $x-1/2, -y+1/2, z+1/2$  #2  $x+1/2, -y+1/2, z+1/2$  #3  $-x-1/2, y+1/2, -z+3/2$  #4  $x+1, y, z$  #5  $-x+1/2, y-1/2, -z+3/2$  #6  $x-1, y, z$  #7  $x-1/2, -y+1/2, z-1/2$  #8  $x+1/2, -y+1/2, z-1/2$  #9  $-x-1/2, y-1/2, -z+3/2$  #10  $-x+1/2, y+1/2, -z+3/2$  #11  $-x-1, -y+1, -z+1$

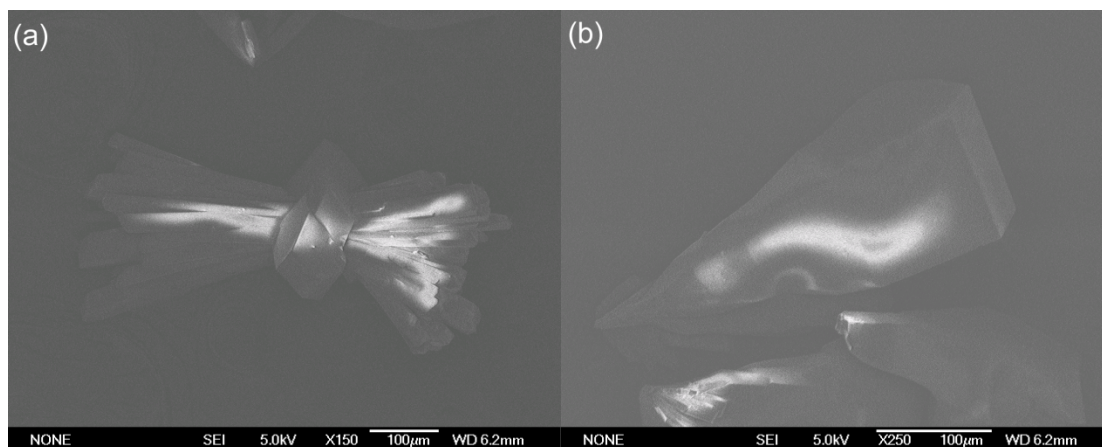

**Figure S1.** SEM images of (a) JU94 (the thin rod-like crystal) and the unknown phase (the block crystal in the center) and (b) JU95 (the rod-like crystal).

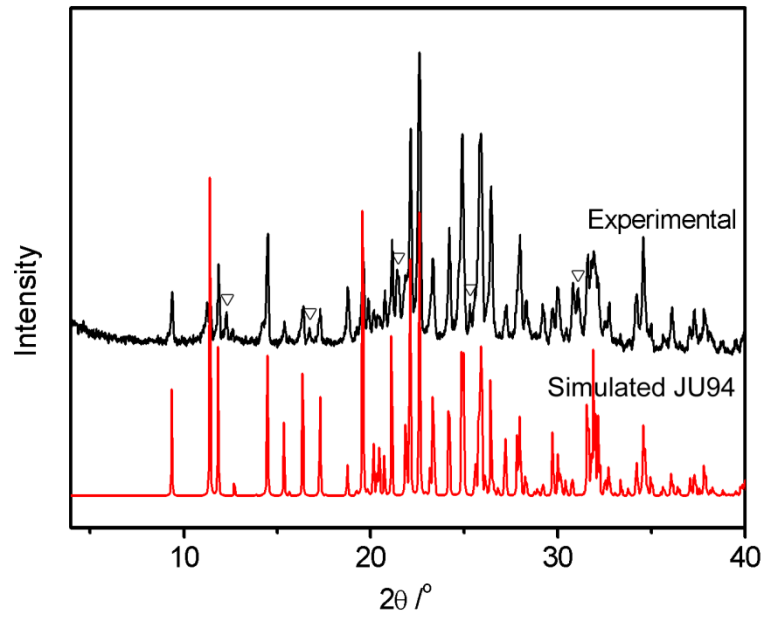

(a)

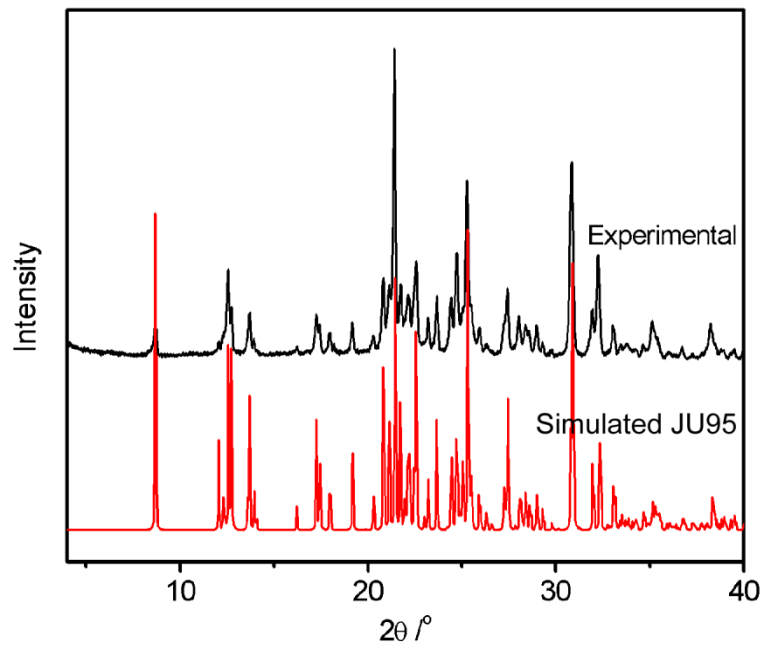

(b)

**Figure S2.** Experimental and simulated PXRd patterns of (a) JU94 (peaks of impurity are marked by triangle) and (b) JU95.

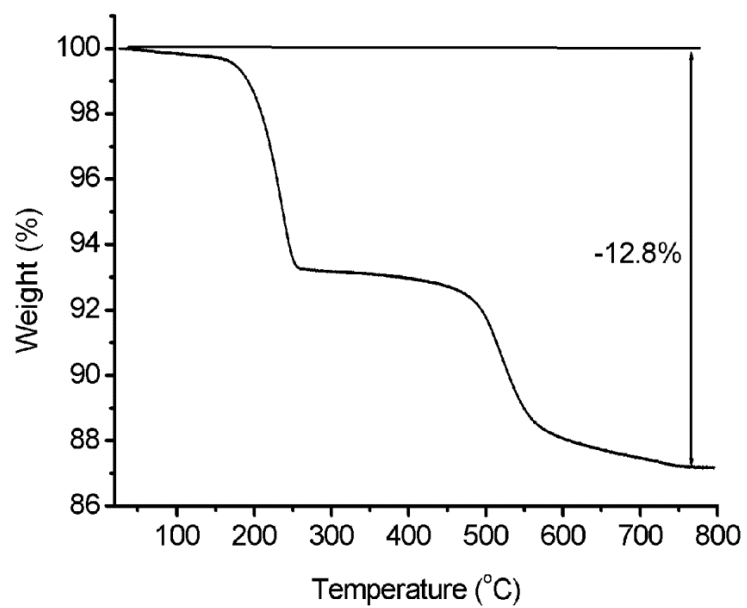

(a)

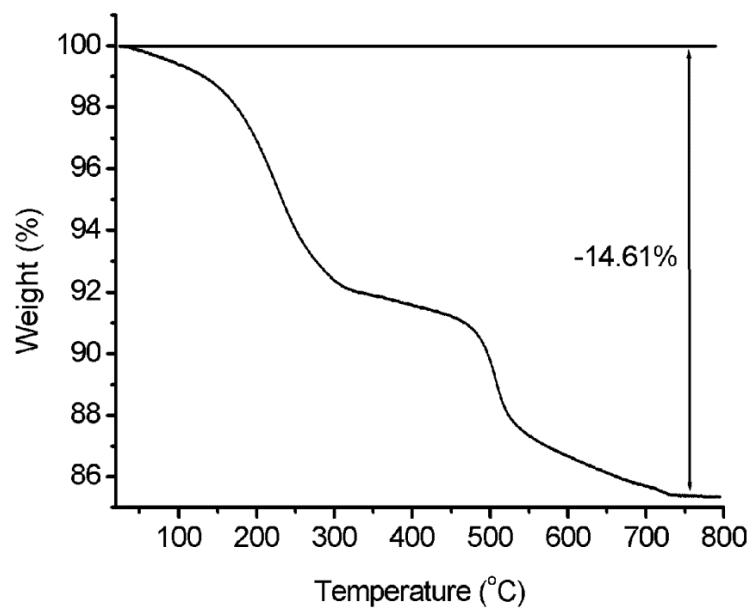

(b)

**Figure S3.** TG curves of (a) JU94 and (b) JU95.

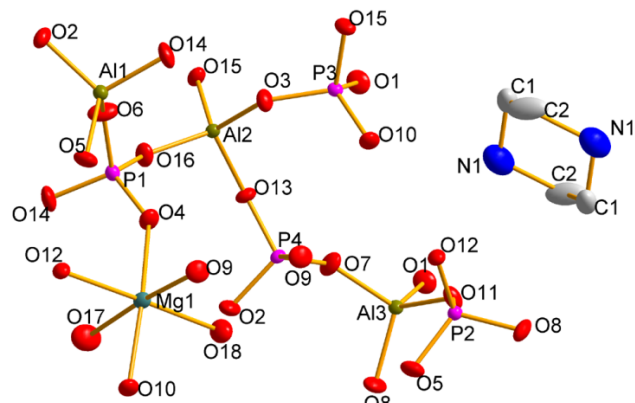

(a)

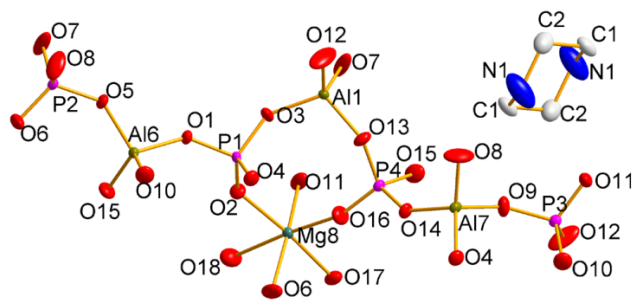

(b)

Figure S4. Thermal ellipsoids of (a) JU94 and (b) JU95 given at 50% probability, showing the atomic labeling scheme.

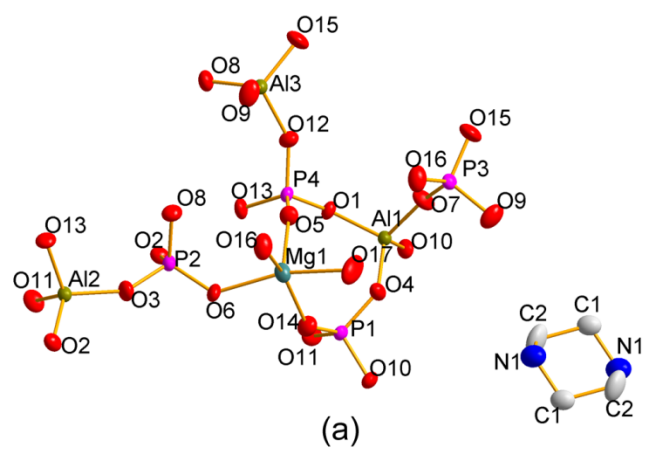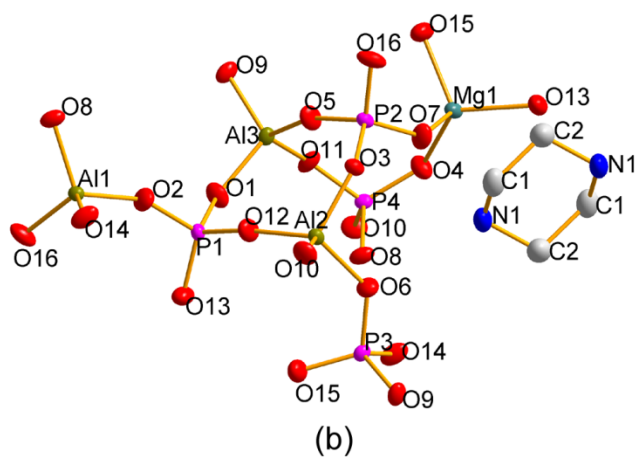

**Figure S5.** Thermal ellipsoids of (a) JU94-400 and (b) JU95-300 given at 50% probability, showing the atomic labelling scheme.
